# Supplementary material
Source: PubMed Central journal article supplement (PMC4641503)
Supplement: embr0016-1511-sd1.pdf [file embr0016-1511-sd1.pdf]

## APPENDIX

### **Resistance of glia-like central and peripheral neural stem cells to genetically-induced mitochondrial dysfunction - differential effects on neurogenesis**

Blanca Díaz-Castro<sup>1,&</sup>, Ricardo Pardal<sup>1,2,3,&</sup>, Paula García-Flores<sup>1,3</sup>, Verónica Sobrino<sup>1</sup>, Rocio Durán<sup>1</sup>, José I. Piruat<sup>\*1</sup> and José López-Barneo<sup>\*1,2,3</sup>

<sup>1</sup>Instituto de Biomedicina de Sevilla (IBiS), Hospital Universitario Virgen del Rocío, CSIC, Universidad de Sevilla, Seville, Spain

<sup>2</sup>Departamento de Fisiología Médica y Biofísica, Universidad de Sevilla.

<sup>3</sup>Centro de Investigación Biomédica en Red sobre Enfermedades Neurodegenerativas (CIBERNED), Spain

& These authors contributed equally to this work

\*Corresponding authors:

### **APPENDIX: MATERIALS AND METHODS**

#### **Tissue preparation and histochemistry**

Mice were heavily anesthetized and then killed by decapitation. Dissected tissues were fixed overnight in paraformaldehyde (4% in PBS) and embedded in paraffin (brain) or OCT (Tissue-Tek; peripheral tissues) before sectioning. Coronal mouse brain sections (20  $\mu$ m thick) were used for NeuN or GFAP immunostaining. Peripheral tissue sections (10  $\mu$ m thick) were used for immunostaining with the different antibodies. Staining procedures were performed as previously described [1, 2]. Nuclei were detected by DAPI staining. Primary antibodies and the dilution factors applied were as follows: mouse anti-NeuN (Millipore; 1:200), rabbit anti-GFAP (Dako; 1:500), rabbit anti-TH (Novus Biological; 1:1000), mouse anti-HuC/D (Invitrogen; 1:1000). Secondary antibodies and dilutions applied were: For 3,3'-diaminobenzidine-based detection, an Envision+ kit (Dako) was used according to the manufacturer's recommended protocol. For fluorescence detection the secondary antibodies used were Alexa568-goat-anti-mouse-IgG (Molecular Probes, 1:500) and Alexa568-goat-anti-rabbit-IgG (Molecular Probes, 1:500).

### **X-gal staining**

Sections of Superior cervical ganglia (SCG) from hGFAP-Cre/floxed LacZ mice were stained to detect the expression of the  $\beta$ -galactosidase by incubating them 12-24 hours at 37°C in X-gal buffer. The buffer was made of PBS (pH=7.4) supplemented with 2 mM MgCl<sub>2</sub> (Sigma), 5 mM potassium ferrocyanide (Sigma), and 5 mM potassium ferricyanide (Sigma). X-gal (Molecular Probes) was added to the buffer right before use, at a final concentration of 1 mg/ml. Once X-gal staining was performed, sections were processed for antibody staining as indicated previously.

### **Tissue dissociation and neurosphere assays**

Mouse CBs were dissociated by enzymatic treatment in PBS solution containing 0.6 mg/ml collagenase type II (Sigma) and 0.3 mg/ml trypsin (Sigma) for 20 min at 37 °C in a glass flask at 600 rpm in a Thermomixer Comfort (Eppendorf). After enzymatic treatment, two volumes of staining solution were added to quench enzymes. The staining solution contained (per 50 ml): 44 ml L15 medium (GIBCO), 0.5 ml penicillin/streptomycin (GIBCO), 0.5 ml 1 M HEPES buffer (GIBCO), 0.1 g BSA (Sigma), and 5 ml distilled and deionized water to volume. Dissociated CB cells were centrifuged at 300 x g for 5 min at 4 °C. The cell pellet was then resuspended and plated in an ultra-low binding well for neurosphere assays, or on cover slips for immunocytochemistry.

For the growth of neurospheres, dissociated mouse CB cells were typically cultured in ultra-low binding 6-well plates (Corning Inc.) at a clonal density of 10000 cells per well so that individual neurospheres were spatially separated from each other. The culture medium contained D-MEM:F-12 (GIBCO BRL) with 15% FBS (GIBCO), 1% N2 supplement (GIBCO), 2% B27 supplement (GIBCO), 1% penicillin/streptomycin (GIBCO), 20 ng/ml recombinant human bFGF (R&D Systems), 20 ng/ml recombinant human IGF-1 (R&D Systems), and 20 ng/ml recombinant human EGF (R&D Systems). All cultures were maintained in O<sub>2</sub>- and CO<sub>2</sub>-controlled incubators (Thermo Electron Corp) at 21% O<sub>2</sub>, and 37 °C.

To prepare cultures of brain NSCs, the SVZ area of freshly dissected mouse brains was removed and suspended after mechanical dissociation in PBS with 25 mg/mL deoxyribonuclease type 1 (DNase1, Sigma) and 0.3 mg/mL of trypsin (Sigma) for 20 min at 37 °C. After quenching and centrifuging, the cells were

resuspended, filtered through nylon mesh (pore size:45 µm, SefarMaissa), counted with the aid of a hemocytometer, and plated.

Free-floating cultures of brain neurospheres were obtained by plating SVZ cells in ultra-low binding 6-well plates (Corning Incorporated, Corning, NY), at clonal density to avoid neurosphere fusion. The culture medium was based on DMEM:F12 and was supplemented with 1% penicillin/streptomycin (Biowhittaker), 1% N<sub>2</sub> supplement (Gibco), 2% B27 supplement (Gibco), 20 ng/ml recombinant human bFGF (R&D Systems), 20 ng/ml EGF (R&D Systems) and 10 ng/ml IGF (R&D Systems). All cultures were maintained at 37 °C in 5% CO<sub>2</sub>/balance air. After 10 days in culture, the diameters of neurospheres were quantified using ImageJ software (NIH). For differentiation assays, SVZ neurospheres were plated under adherent conditions in 6-well plates previously treated with 0.15 mg/ml human fibronectin (Biomedical Technologies). Mitogens (FGF, EGF and IGF) were removed from the culture medium [3].

### **Cell sorting**

Dissected cortex and striatum from mouse brains were mechanically dissociated and resuspended in staining solution (per 50 ml: 44 ml L15 medium (GIBCO), 0.5 ml penicillin/streptomycin (Cambrex), 0.5 ml 1 M HEPES buffer (GIBCO), 0.1 g BSA (Sigma), and 5 ml distilled and deionized water to volume). Cell sorting of GFAP+ cells was performed in a MoFlow three-laser flow cytometer (DakoCytomation). During sorting, 7-AAD+ (Molecular Probes) dead cells were eliminated. For RNA extraction, cells were harvested and stored frozen in liquid nitrogen until use.

### **Immunocytochemistry**

SVZ cultured cells were fixed in 4% PFA (prepared in PBS) for 15 min at room temperature. Primary antibodies were incubated overnight at 4 °C, and secondary antibodies were incubated for 1-2 hr at room temperature. The antibodies used were rabbit anti-Tuj1 (Abcam; 1:1000), Alexa488-donkey-anti-rabbit-IgG (Molecular Probes, 1:500), rabbit anti-GFAP (DAKO, 1:500), Alexa568-goat-anti-rabbit-IgG (Molecular Probes, 1:500), mouse anti-O4 (Chemicon, 1:2000), and Alexa568-Goat-anti-Mouse-IgM (Invitrogen, 1:1000).

### ***SdhD* DNA and mRNA analyses**

DNA and RNA analyses were performed as described previously [1]. Genomic DNA

was extracted from nuclear fractions obtained from the different brain or peripheral tissues by overnight incubation at 37 °C in 0.1 M Tris-HCl (pH 8.5), 5 mM EDTA, 0.2% SDS, 0.2 M NaCl, and 100 µg/ml proteinase K. The relative amount of the *SdhD<sup>fllox</sup>* allele was estimated by qPCR using the following primers: 5'-CTATGTAGGAGTCTGCAGCCAAGCT-3', 5'-ACTCAAGGTCAGCCTCACCTACCTAT-3', and normalized to the PCR product of the *GusB* gene. Total RNA was prepared from frozen tissues by using an RNA asymlinkit (Qiagen) according to the manufacturer's directions. Reverse transcription of mRNA was performed with a Superscript II reverse transcriptase kit (Invitrogen), and the *SdhD* cDNA was amplified by quantitative PCR with the primers 5' CCAGCACATTACCTGTCA-3' and 5'-ATCAGCCCCAAGAGCAGAA-3' in the presence of SYBRgreen (Life Technologies). The *Arbp* housekeeping gene was used for normalization.

### **Mitochondria isolation and complex II activity**

Mitochondrial complex II activity was determined according to Piruat et al. [4] with slight modifications. Briefly, 30-50 µg of protein were assayed at 30 °C. Samples were diluted 1:4 in the assay reaction buffer (25 mM KH<sub>2</sub>PO<sub>4</sub> pH 7.2, 5 mM MgCl<sub>2</sub>, 3 mM potassium cyanide, and 2.5 mg/ml bovine serum albumin) and liquid nitrogen frozen-thawed three times before the assay. Succinate-ubiquinone oxidoreductase (SQR) activity of mitochondrial complex II was measured for a period of two minutes as the decrease in absorbance at 600 nm due to the reduction of 50 µM 2,6-dichlorophenol-indophenol (DCPIP) coupled to reduction of 130 µM ubiquinone-1. The reaction was carried out in presence of 3.6 µM antimycin, 5 µM rotenone and 10 mM succinate.

## **REFERENCES**

1. Diaz-Castro, B., Pintado, C.O., Garcia-Flores, P., Lopez-Barneo, J., and Piruat, J.I. (2012). Differential impairment of catecholaminergic cell maturation and survival by genetic mitochondrial complex II dysfunction. *Mol Cell Biol* 32: 3347-3357.
2. Platero-Luengo, A., Gonzalez-Granero, S., Duran, R., Diaz-Castro, B., Piruat, J.I., Garcia-Verdugo, J.M., Pardal, R., and Lopez-Barneo, J. (2014). An O<sub>2</sub>-sensitive

glomus cell-stem cell synapse induces carotid body growth in chronic hypoxia. *Cell* 156: 291-303.

3. Lois, C., and Alvarez-Buylla, A. (1993). Proliferating subventricular zone cells in the adult mammalian forebrain can differentiate into neurons and glia. *Proc Natl Acad Sci U S A* 90: 2074-2077.

4. Piruat, J.I., Pintado, C.O., Ortega-Saenz, P., Roche, M., and Lopez-Barneo, J. (2004). The mitochondrial SDHD gene is required for early embryogenesis, and its partial deficiency results in persistent carotid body glomus cell activation with full responsiveness to hypoxia. *Mol Cell Biol* 24: 10933-10940.
